# Supplementary material for: Oxygen-proof fluorescence temperature sensing with pristine C70encapsulated in polymernanoparticles
Source: Royal Society of Chemistry journal article supplement (doi:10.1039/b920673f), 2009-12-16
Supplement: b920673f.pdf [file b920673f.pdf]

## Supporting Information

### Oxygen-Proof Optical Temperature Sensing with Pristine C<sub>70</sub> Encapsulated in Polymer Nanoparticles

Vera Augusto, Carlos Baleizão \*, Mário N. Berberan-Santos, and José Paulo S. Farinha\*

*CQFM-Centro de Química-Física Molecular and IN-Institute of Nanoscience and Nanotechnology, Instituto Superior Técnico, Universidade Técnica de Lisboa, 1049-001 Lisboa, Portugal. Email: carlos.baleizao@ist.utl.pt ; farinha@ist.utl.pt*

From the analysis of the delayed fluorescence data and using a method previously developed,<sup>1</sup> it is possible to obtain the singlet-triplet energy gap ( $\Delta E_{ST}$ ) from the temperature dependence of the  $I_{DF}/I_{PF}$  ratio using the following equation

$$\ln \left[ \frac{I_{PF}}{I_{DF}} - \left( \frac{1}{\Phi_T} - 1 \right) \right] = \ln \left[ \frac{1}{\Phi_T} \left( \frac{1}{\Phi_S^\infty} - 1 \right) \right] + \frac{\Delta E_{ST}}{RT} \quad (\text{eq. S1})$$

However, the correct value of the triplet quantum yield ( $\Phi_T$ , assumed to be temperature-independent) is required for a linear least-squares fit. The shape of the plot is very sensitive to  $\Phi_T$  and is in general nonlinear (Figure S-1). Variation of this parameter in the search for maximum linearity yields its best value and, simultaneously,  $\Delta E_{ST}$ .

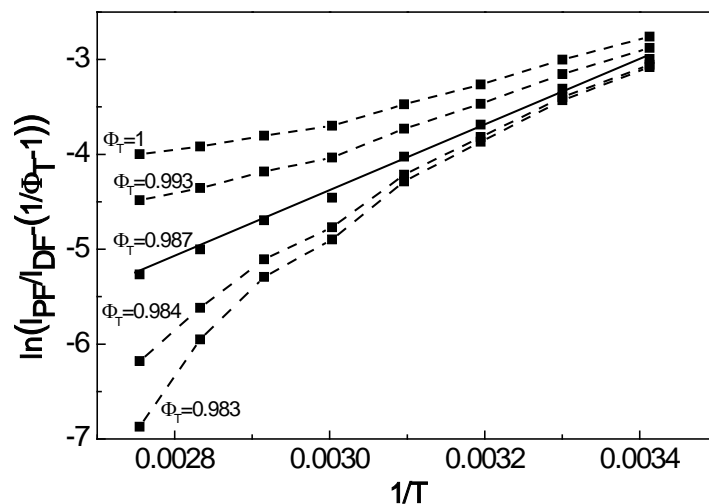

**Figure S-1.** Fit of  $\ln[I_{PF}/I_{DF} - (1/\Phi_T - 1)]$  versus  $1/T$  according to eq. S1 for a film of PS-C<sub>70</sub> nanoparticles (20 °C to 90 °C in 10 °C steps). The best straight line ( $r^2 = 0.998$ ) is obtained for  $\Phi_T = 0.987$ .

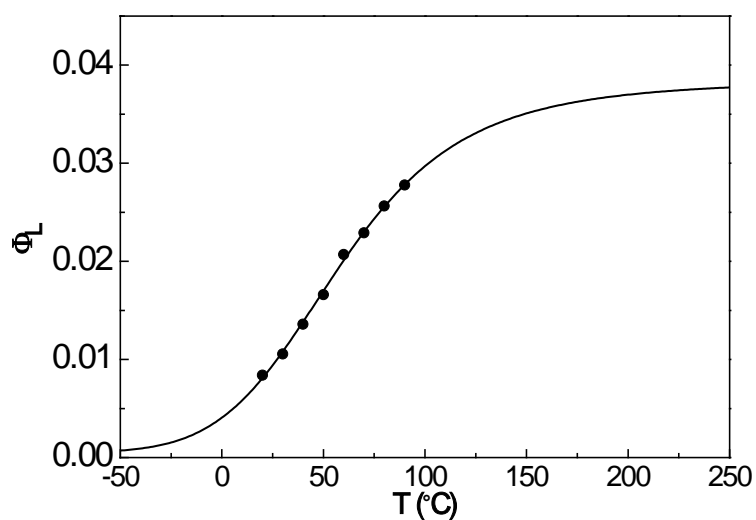

**Figure S-2.** Temperature dependence of the luminescence quantum yields ( $\Phi_L$ ) of PS-C<sub>70</sub>. Experimental points are shown as circles.

#### References

- [1] Berberan-Santos, M. N.; Garcia, J. M. M. *J. Am. Chem. Soc.* **1996**, *118*, 9391.
